# Supplementary material
Source: publisher site journal article supplement (https://www.spandidos-publications.com/6021/downloadSupplementary)

Figure S1. Effects of Enz and Chid alone or in combination on the expression levels of AR in MDA-MB-231 cells. AR, androgen receptor; Chid, chidamide; Comb, combination; Con, control; Enz, enzalutamide.

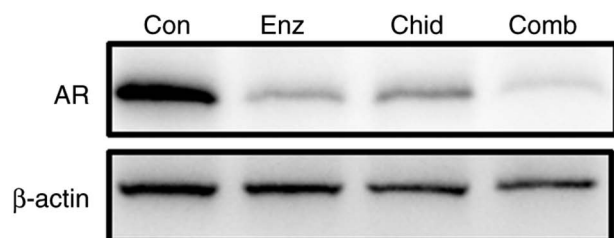

Figure S2. Significantly enriched pathways in response to enzalutamide + chidamide combination treatment.

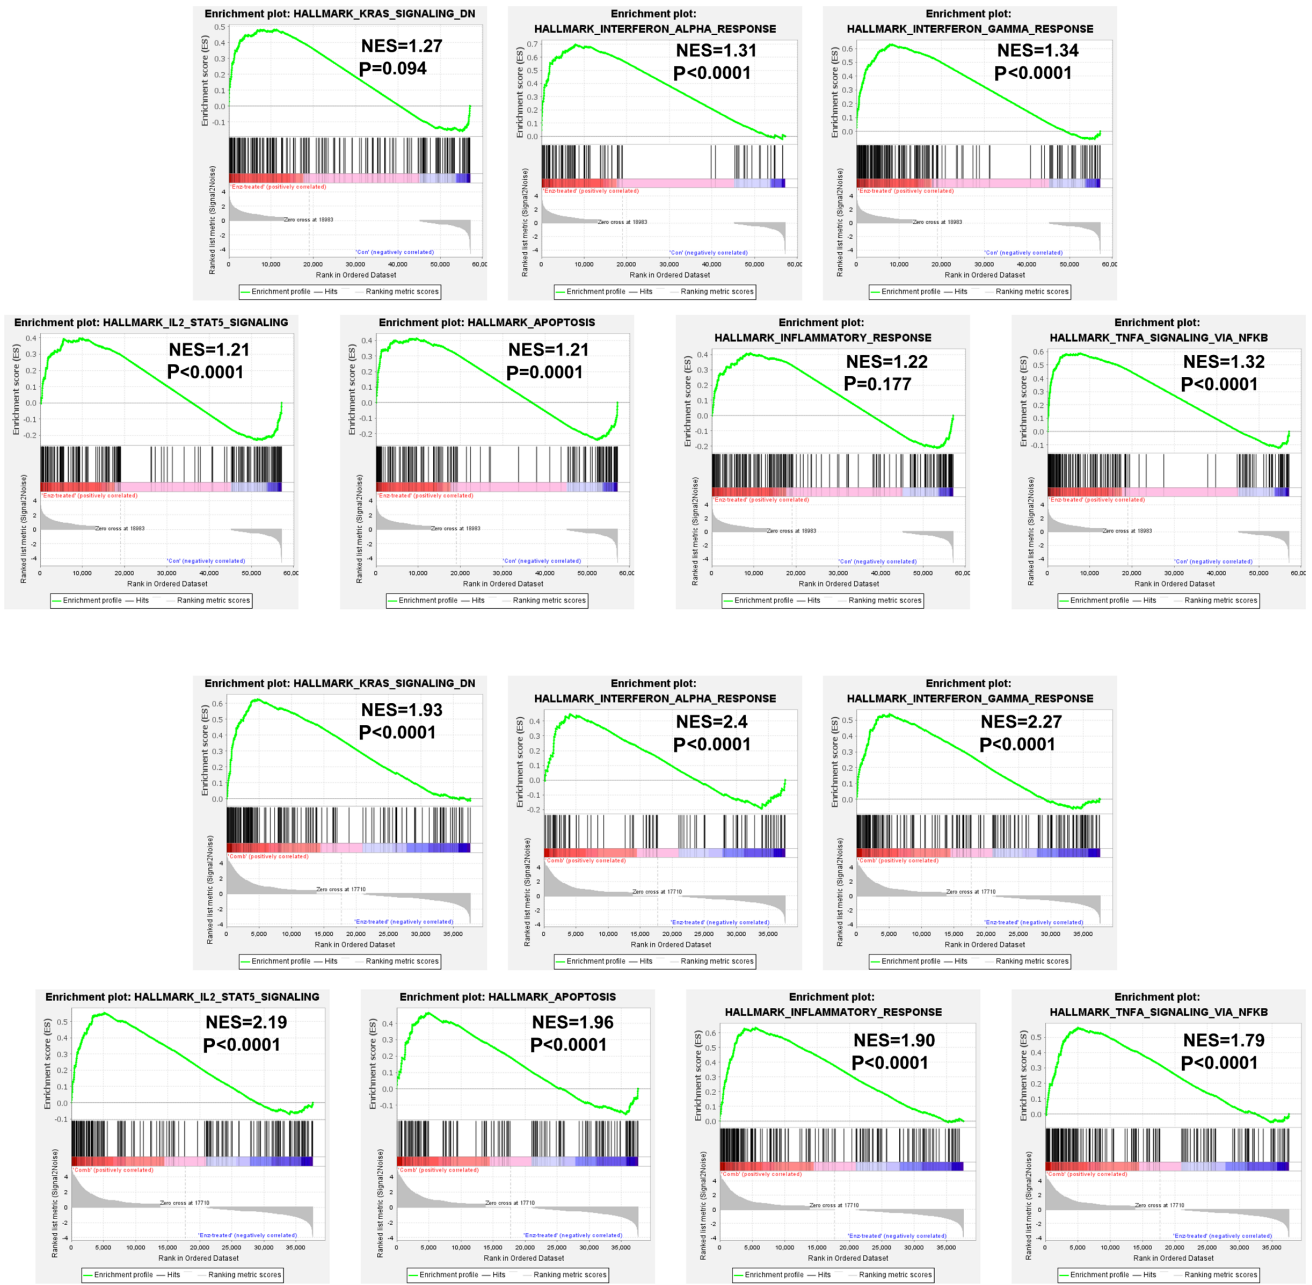

Supplement: Supplementary file 1 [file downloadSupplementary]
